# Supplementary material
Source: MDPI journal article supplement (https://www.mdpi.com/2071-1050/14/3/1141)
Supplement: s1 [file s1]

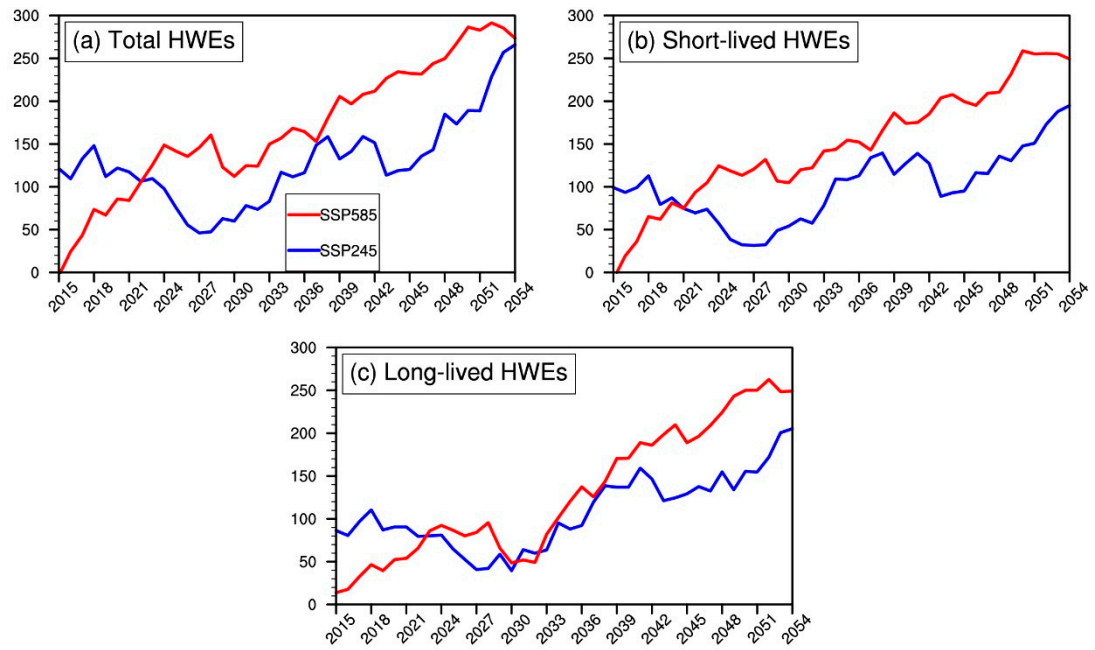

**Figure S1.** The anomalies of the number of grids covered by (a) total HWEs (grids), (b) short-lived HWEs (grids) and (c) long-lived HWEs (grids) relative to the 1995-2014 reference period over the YRB region. The time series are smoothed with a 9-year running mean filter.
